# Supplementary material for: Integrating External Controls by Regression Calibration for Genome-Wide Association Study
Source: Preprints.org preprint supplement (doi:10.20944/preprints202312.1184.v1), 2023-12-15
Supplement: Supplementary file 1 [file supplementary]

# Supplementary Materials

Integrating external controls by regression calibration for genome-wide association study

Lirong Zhu1, Shijia Yan1, Xuewei Cao1, Shuanglin Zhang1, Qiuying Sha1,*

1Department of Mathematical Sciences, Michigan Technological University, Houghton, Michigan, USA

*Corresponding author: Qiuying Sha, Department of Mathematical Sciences, Michigan Technological University, Houghton, Michigan 49931, USA. E-mail: qsha@mtu.edu

**Table S1.** Empirical type I error rates of iECAT-RC, compared with other three methods iECAT-N, Internal, and iECAT-Score at different significance levels, , , , and with DVS = 0.5.

| **Model** | **Significance level** | **iECAT-RC** | **iECAT-N** | **Internal** | **iECAT-Score** |
| --- | --- | --- | --- | --- | --- |
| Model 1 | 0.05 | 0.033 | **0.3895** | 0.05 | 0.0457 |
| 0.01 | 0.0057 | **0.3285** | 0.0102 | 0.0077 |
| 0.001 | 3.00E-04 | **0.2762** | 0.0012 | 9.00E-04 |
| 1E-04 | 0 | **0.2386** | 2.00E-04 | 0 |
| Model 2 | 0.05 | 0.0529 | **0.4083** | 0.0343 | 0.0449 |
| 0.01 | 0.0109 | **0.357** | 0.0089 | 0.0111 |
| 0.001 | 7.00E-04 | **0.3217** | 9.00E-04 | 0.0016 |
| 1E-04 | 1.00E-04 | **0.2912** | 1.00E-04 | 0 |
| Model 3 | 0.05 | 0.0464 | **0.1334** | 0.0139 | 0.0377 |
| 0.01 | 0.0103 | **0.0829** | 0.0037 | 0.0066 |
| 0.001 | 9.00E-04 | **0.0513** | 5.00E-04 | 8.00E-04 |
| 1E-04 | 0 | **0.0364** | 0 | 0 |
| Model 4 | 0.05 | 0.0323 | **0.4163** | 0.042 | 0.0407 |
| 0.01 | 0.0052 | **0.3292** | 0.0089 | 0.0082 |
| 0.001 | 6.00E-04 | **0.2608** | 0.0013 | 4.00E-04 |
| 1E-04 | 2.00E-04 | **0.2231** | 3.00E-04 | 0 |
| Model 5 | 0.05 | 0.0501 | **0.475** | 0.0327 | 0.0492 |
| 0.01 | 0.0117 | **0.4002** | 0.0097 | 0.0087 |
| 0.001 | 0.0016 | **0.3289** | 0.0011 | 0.0016 |
| 1E-04 | 0 | **0.2775** | 1.00E-04 | 4.00E-04 |
| Model 6 | 0.05 | 0.0453 | **0.1017** | 0.0139 | 0.0316 |
| 0.01 | 0.0102 | **0.0546** | 0.0044 | 0.0072 |
| 0.001 | 0.0012 | **0.028** | 8.00E-04 | 7.00E-04 |
| 1E-04 | 0 | **0.0158** | 1.00E-04 | 0 |

Notes: Type I error rates are evaluated based on simulations.The bold-faced values indicate the type I error rates beyond the upbound of the corresponding 95% confidence interval.

**Table S2.** The relative frequency of significant SNPs identified by each method using 10,000 repeated samples.

| **Chr** | **SNP** | **Base Position** | **iECAT-RC** | **iECAT-Score** | **Internal** |
| --- | --- | --- | --- | --- | --- |
| 22 | rs62228062 | 46381234 | 95.3% | 79.5% | 37.4% |
| 22 | rs9330811 | 46362396 | 54.3% | 38.8% | 3.9% |
| 22 | rs28628653 | 46396925 | 34.7% | 15.2% | 1.1% |
| 7 | rs2290221 | 37987632 | 11.2% | 1.8% | 0.0% |
| 22 | rs9626908 | 46428306 | 8.3% | 0.7% | 0.2% |
| 9 | rs12685782 | 135320210 | 6.3% | 0.2% | 0.1% |
| 22 | rs28520003 | 46411969 | 5.0% | 0.2% | 0.1% |


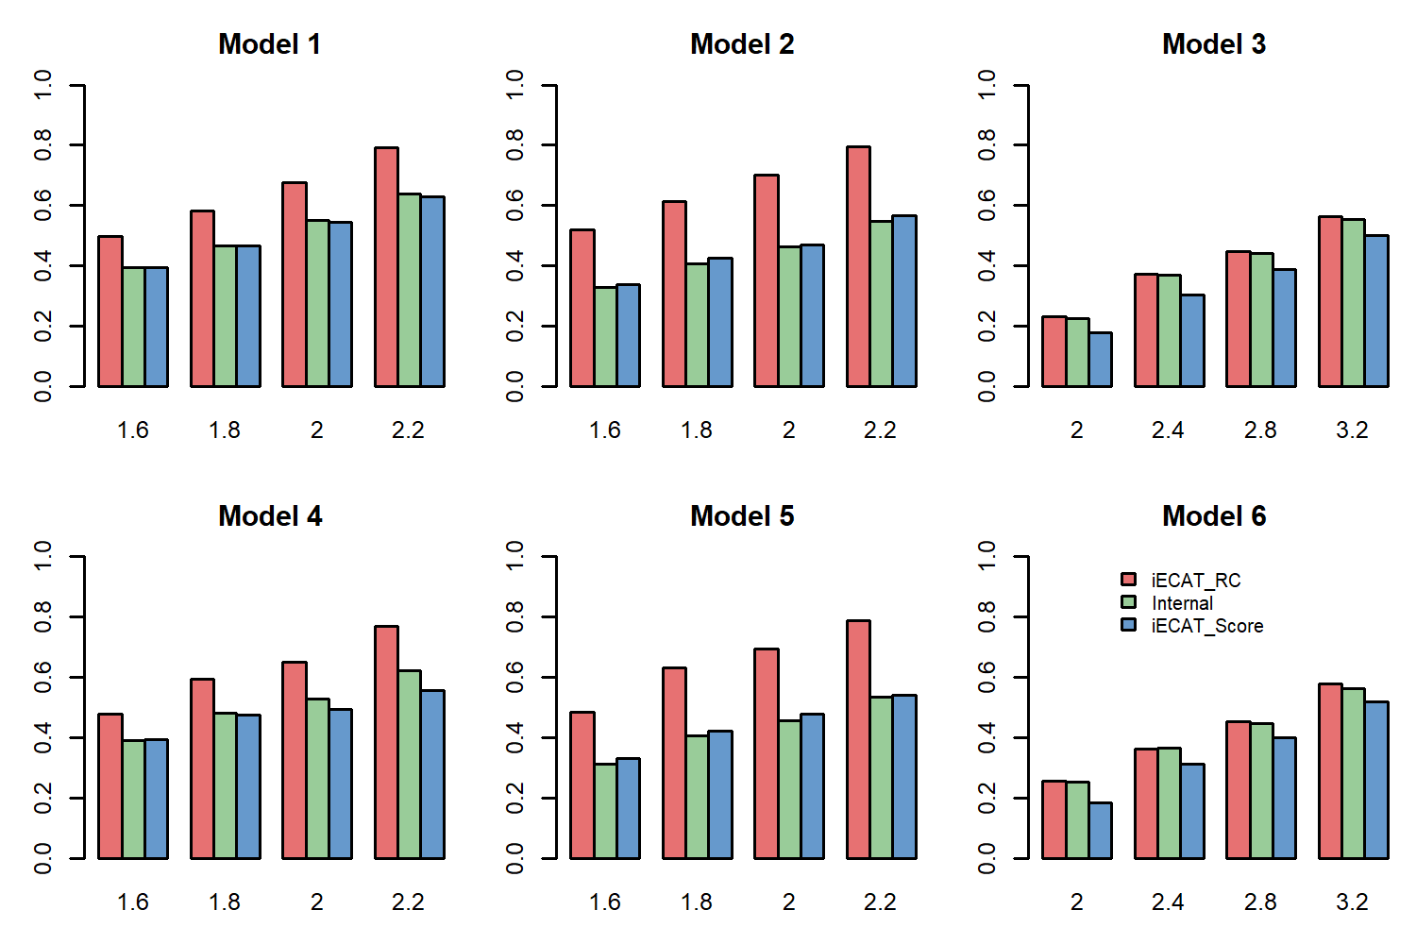


**Fig. S1.** The power comparison of iECAT-RC, Internal, and iECAT-Score when DVS=0.5 at the significance level of . The horizontal axis represents the odds ratio, and the vertical axis represents power.
